# Supplementary material
Source: Research Square preprint supplement (doi:10.21203/rs.3.rs-9557287/v1)
Supplement: Supplementary file 3 [file Results_in_Physics.pdf › Results_in_Physics.pdf]

# Results in Physics
